# Supplementary material for: Amplified summer extreme precipitation over the Tibetan Plateau in the early 21st century
Source: Research Square preprint supplement (doi:10.21203/rs.3.rs-6898989/v1), 2025-06-25
Supplement: Supplementary file 1 [file 3b7e4b2ba1746037cba45699.docx]

**Supplementary information**

**Amplified summer extreme precipitation over the Tibetan Plateau in the early 21st century**

Fangchi Liu1, Xiaojing Jia1*, Wei Dong1, Xinhai Chen1 and Qifeng Qian2

*1Key Laboratory of Geoscience Big Data and Deep Resource of Zhejiang Province, School of Earth Sciences,*

*Zhejiang University, Hangzhou, Zhejiang, China*

*2 Zhejiang Institute of Meteorological Science, HangZhou, Zhejiang, China.*

**Supplementary Figure S1.** The ratio of extreme precipitation amount (EPA; units: mm) relative to total precipitation amount (TPA; units: mm) over the Tibetan Plateau (TP) during summer (June–July–August, JJA) for the period 1979–2022 (black line). The green line and its surrounding shading indicate the linear trend and standard error range for the first period (P1, 1979–2000), while the light pink line and shading represent the same for the second period (P2, 2001–2022).

**Supplementary Figure S2.** Decomposition analysis of extreme precipitation amount (EPA, units: mm) into the relative contributions of frequency (EPF, units: days) and intensity (EPI, units: mm day-1) over the Tibetan Plateau (TP) during June–July–August (JJA). The partial contributions from (a) EPI (DEPI), and (b) the nonlinear interaction between frequency and intensity (DEPF*DEPI).

**Supplementary Figure S3.** Linear trend fields of extreme precipitation intensity (EPI, units: mm day-1 decade-1) over the Tibetan Plateau (TP) during June–July–August (JJA) for the period 2001–2022, with slanting lines indicating regions exceeding the 95% confidence level.

**Supplementary Figure S4.** The principal component (PC1) time series associated to the first Empirical Orthogonal Function (EOF1) mode of extreme precipitation frequency (EPF, units: ndays) over the Tibetan Plateau (TP) during June–July–August (JJA) from 1979 to 2022, showing a significant correlation with observed EPF at the 99% confidence level (**)

**Supplementary Figure S5.** Differences in the cumulated extreme precipitation amount (DEPA, units: mm) over the Tibetan Plateau (TP) during June–July–August (JJA) between the first period (P1, 1979–2000) and the second period (P2, 2001–2022) for three clusters.

**Supplementary Figure S6.** Composite anomalies of the North Atlantic total heat source (Q1; positive upward; units: W m-2) and Arctic surface turbulent heat flux (STHF, sum of sensible and latent heat fluxes; positive upward; units: 105 J m-2) associated with the first cluster (C1) during P2 (2001­–2022). (a) Normalized time series of monthly cumulative frequency of C1 (C1MF), with red circles denoting standardized values exceeding 1.0, which are selected for compositing heat flux anomalies relative to the other months. (b) Q1 anomalies over the North Atlantic. (c) STHF anomalies over the Arctic. Shaded regions with slanting lines indicate areas exceeding the 95% confidence level.

**Supplementary Figure S7**. Multiple regression model with the dependent variable: extreme precipitation frequency (EPF, units: days) over the Tibetan Plateau (TP), and the independent variables: normalized indices of North Atlantic sea surface temperature (NASSTI) and Arctic sea ice concentration (ASICI) during June–July–August (JJA) for the period 1979–2022. (a) The spatial distribution of multiple correlation coefficients, with an overall contribution of 32.4%. (b) Partial regression coefficient field of NASSTI. Asterisks (*) denote statistical significance of the regression with TP-averaged EPF at the 95% confidence level. (c) Partial regression coefficient field of ASICI. Slanting lines indicate the 95% confidence level.
